# Supplementary material for: Activity and interactions of methane seep microorganisms assessed by parallel transcription and FISH-NanoSIMS analyses
Source: PubMed Central journal article supplement (PMC4817681; doi:10.1038/ismej.2015.145), 2015-09-22
Supplement: ismej2015145x1.pdf [file ismej2015145x1.pdf]

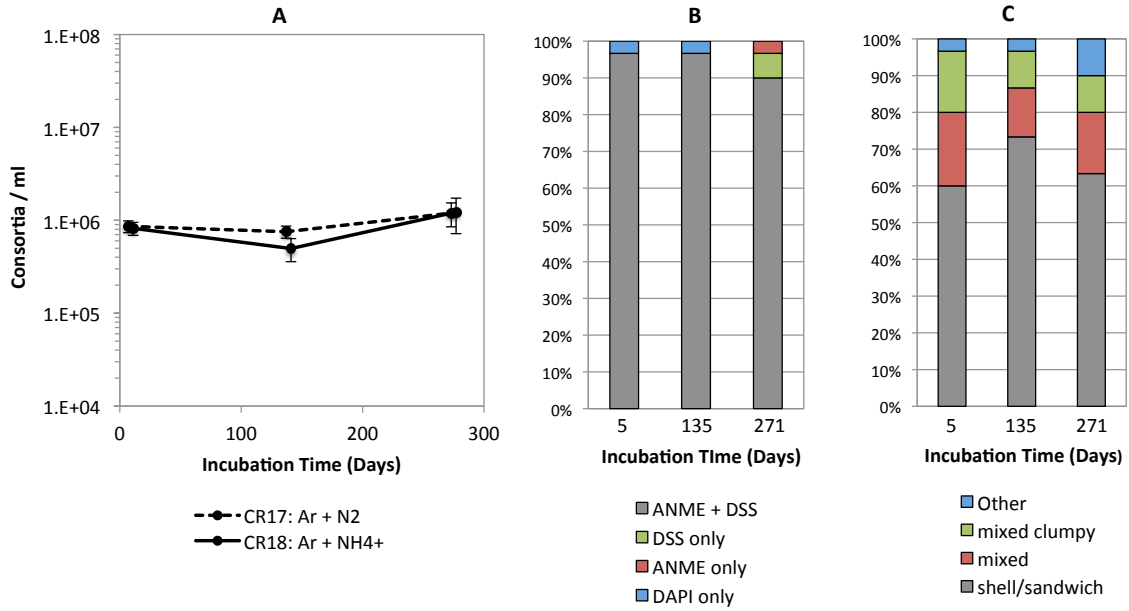

**SI Figure 1.** Persistence of ANME-DSS consortia in the absence of methane. Change in consortia abundance (A), composition (B), and morphology (C) is shown. Consortia were hybridized with FISH probes EelMS\_932 (targeting ANME-2) and DSS\_658 (targeting *Desulfocarsina/Desulfococcus/Seep-SRB1*). A: Error bars are one standard deviation calculated from triplicate filters. B and C: Thirty aggregates from incubation CR17 were evaluated for composition and morphology at each time point.
