# Supplementary material for: Activity and interactions of methane seep microorganisms assessed by parallel transcription and FISH-NanoSIMS analyses
Source: PubMed Central journal article supplement (PMC4817681; doi:10.1038/ismej.2015.145), 2015-09-22

SI Figure 4.

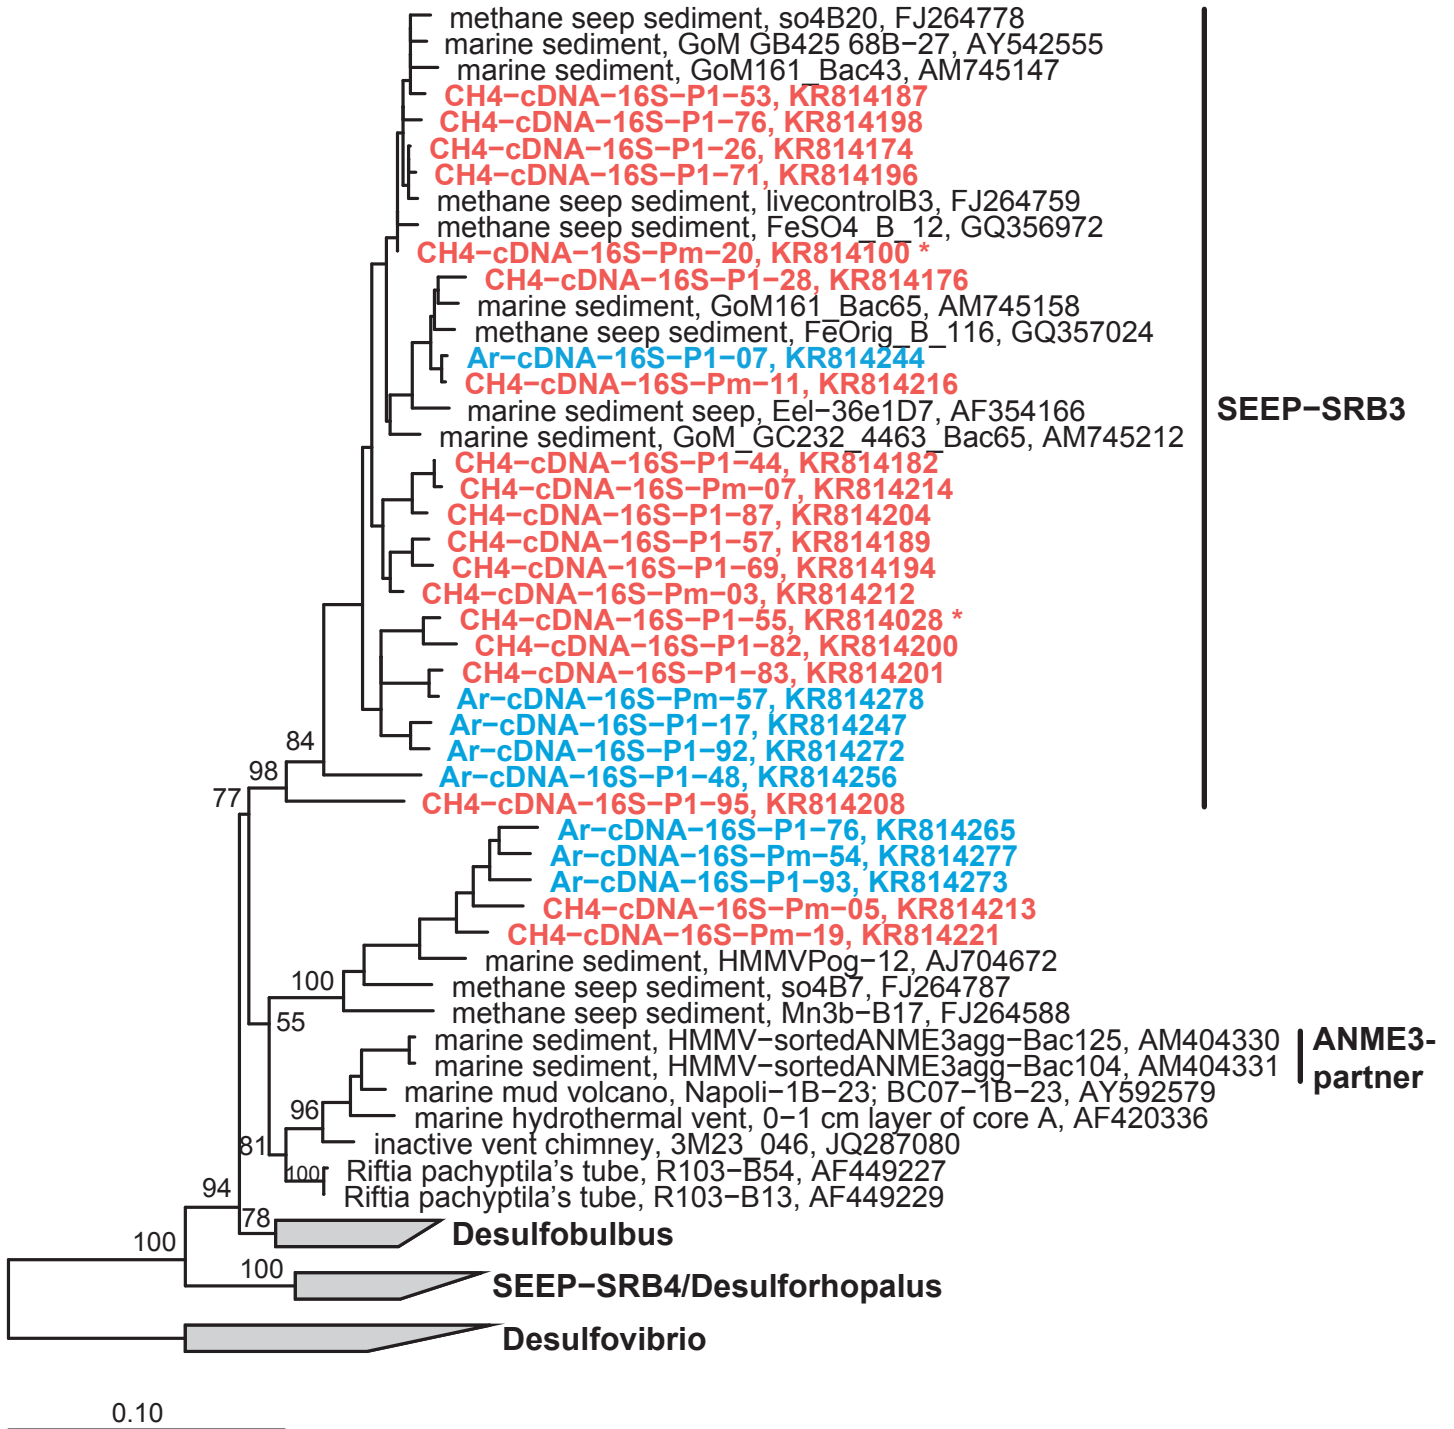

Supplement: ismej2015145x4.pdf [file ismej2015145x4.pdf]
